# Supplementary material
Source: publisher figshare collection journal article supplement (https://acs.figshare.com/ndownloader/files/25666879)
Supplement: Supplementary file 1 [file 25666879]

## Supporting information

### ***In situ* Fourier transform infrared spectroscopic imaging for elucidating variations in chemical structures of polymer composites at the matrix-filler interface during reactive processing**

Ryota Watanabe\*, Aki Sugahara, Hideaki Hagihara, Junji Mizukado and Hideyuki Shinzawa\*

Research Institute for Sustainable Chemistry, National Institute of Advanced Industrial Science and Technology (AIST), 1-1-1 Higashi, Tsukuba 305-8565, Japan

Tel: +81-29-861-3709, Fax: +81-29-861-4457

Correspondence authors.

*E-mail address:* r.watanabe@aist.go.jp (R. Watanabe) and h-shinzawa@aist.go.jp (H. Shinzawa)

## TABLE OF CONTENTS

|                                               |    |
|-----------------------------------------------|----|
| 1. Cross-sectional images of composites ..... | S3 |
| 2. Mechanical properties of SEBS .....        | S4 |
| 3. Elastic moduli of MA-SEBS/AmSS .....       | S5 |
| 4. FTIR spectrum of SEBS .....                | S6 |
| 5. FTIR spectra of SS and AmSS .....          | S7 |

### 1. Cross-sectional images of composites

The filler dispersion in MA-SEBS/AmSS and MA-SEBS/SS was evaluated by observation at cross-section of the sample sheets using a microscope (TG300PC2, Shodensha, Osaka, Japan).

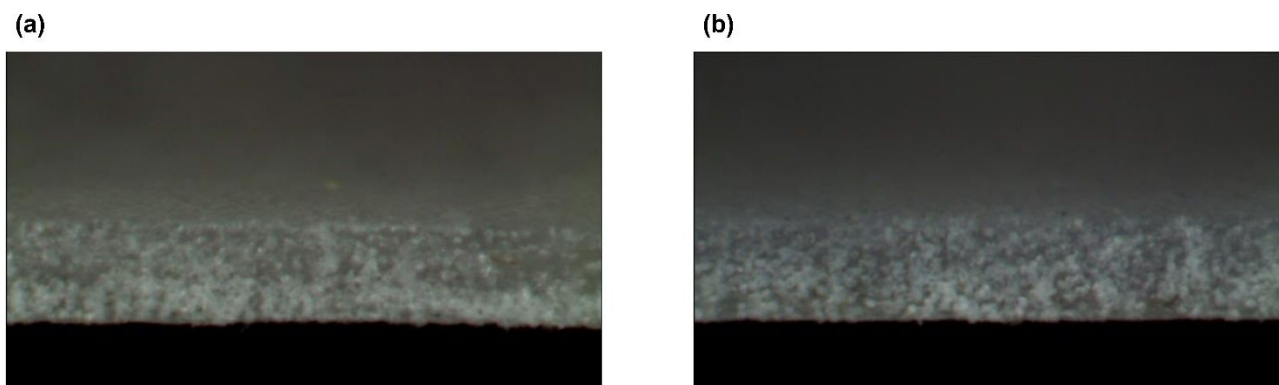

**Figure S1.** Cross-sectional optical images of (a) MA-SEBS/AmSS and (b) MA-SEBS/SS.

## 2. Mechanical properties of SEBS

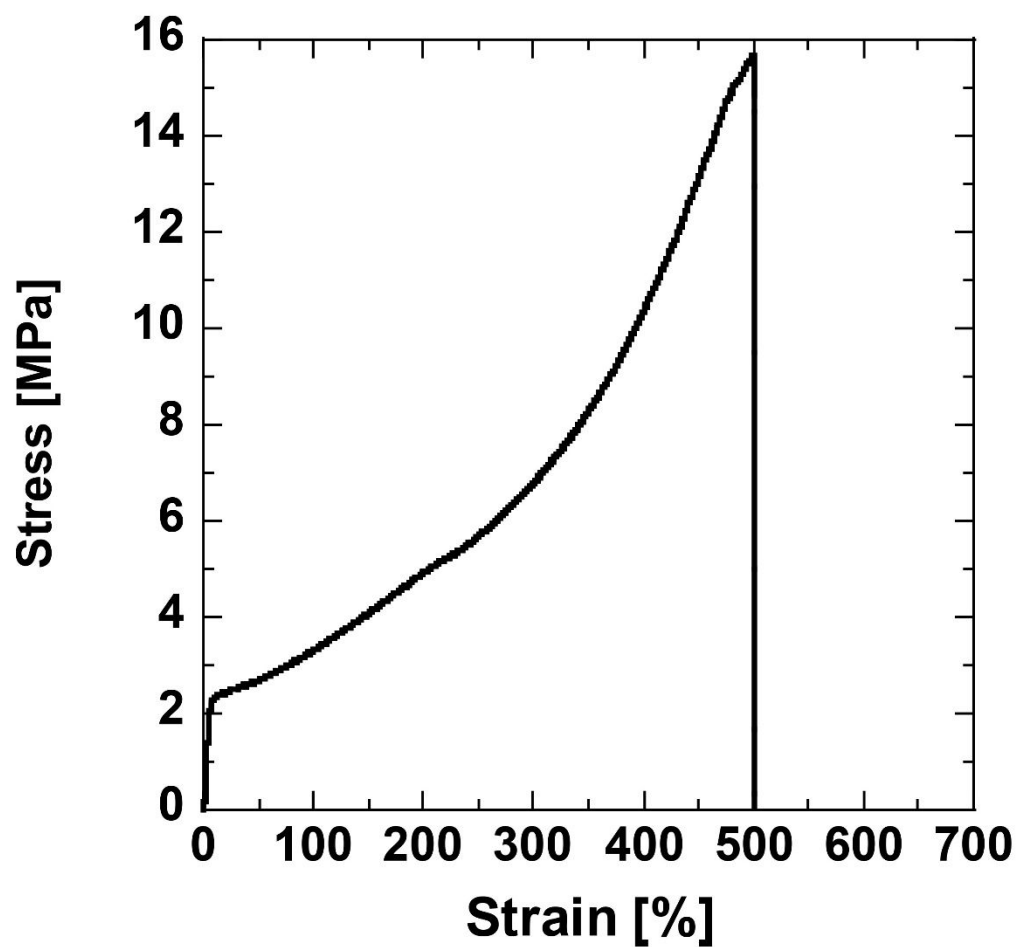

**Figure S2.** Stress-strain curve of SEBS.

**Table S1.** Mechanical properties of SEBS

| Sample | Elastic modulus [MPa] | Stress at 100% strain [MPa] | Elongation at break [%] |
|--------|-----------------------|-----------------------------|-------------------------|
| SEBS   | $50.3 \pm 7.6$        | $3.2 \pm 0.2$               | $487 \pm 15$            |

### 3. Elastic moduli of MA-SEBS/AmSS

Elastic moduli of the MA-SEBS composites containing 0, 10, 20 and 30 wt% of AmSS were measured. The elastic modulus increases with increasing AmSS content without steep increase of the value. This indicates that a percolated structure in the composite at the high wight loading of the filler is not formed for the polymer composites.

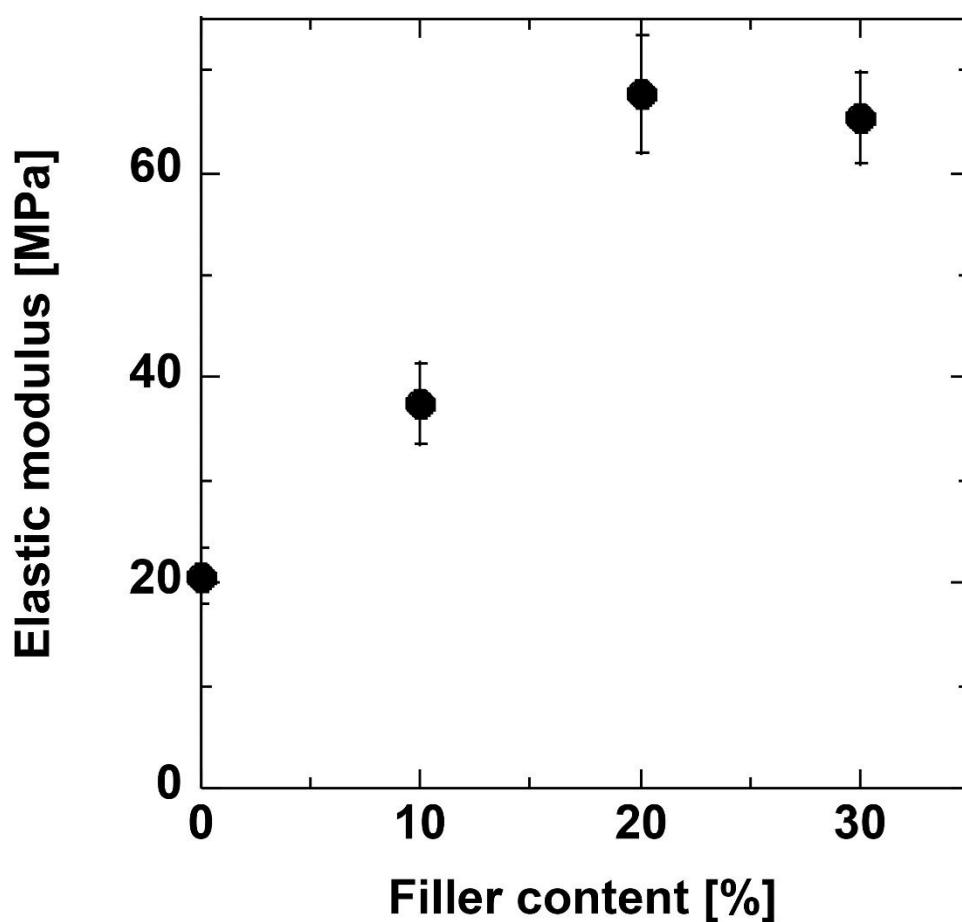

**Figure S3.** Elastic moduli of MA-SEBS composites containing 0, 10, 20 and 30 wt% of AmSS.

#### 4. FTIR spectrum of SEBS

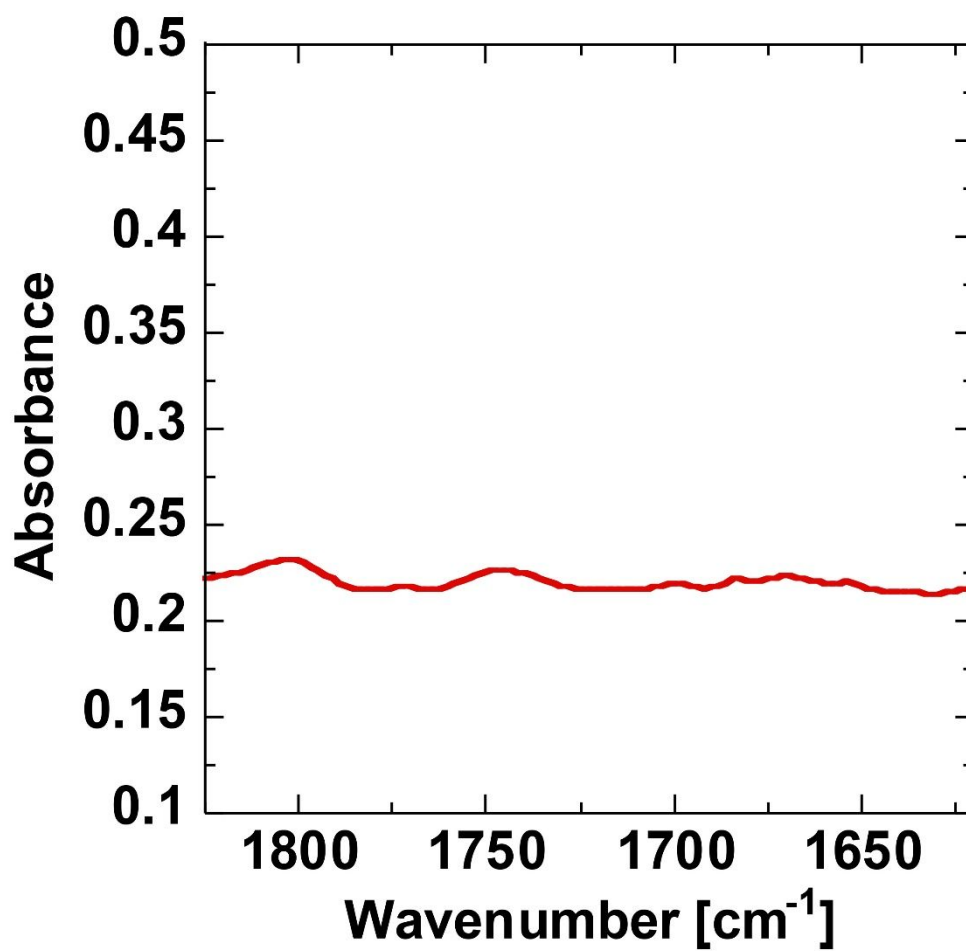

**Figure S4.** FTIR spectrum of SEBS in the 1825 – 1620 cm<sup>-1</sup> region.

## 5. FTIR spectra of SS and AmSS

The FTIR spectra of the SS and AmSS show different features (Figure S5a). AmSS has clear absorption bands assignable to the C-H stretching mode in the 3100 - 2700  $\text{cm}^{-1}$  region, and a broad absorption band assignable to the N-H stretching mode in the 3400 - 2500  $\text{cm}^{-1}$  region, which are derived from the aminopropyl group. On the other hand, SS shows no significant absorption bands attributable to C-H or N-H groups. A broad band in the 3600-3200  $\text{cm}^{-1}$  region is assigned to silanol groups interacting mutually through hydrogen bonds. Absorption near 3750  $\text{cm}^{-1}$  is due to the OH stretching vibration of isolated silanol groups which are located at silica surface.<sup>1</sup> IR absorption intensity at 3750  $\text{cm}^{-1}$  for AmSS is much smaller than that for SS. In other words, the most of surface silanol groups of AmSS are reacted during the modification process with aminopropyl groups. In addition, no significant IR absorption in the 1825 - 1620  $\text{cm}^{-1}$  region, where some carbonyl peaks often appear, is observed in either SS or AmSS (Figure S5b).

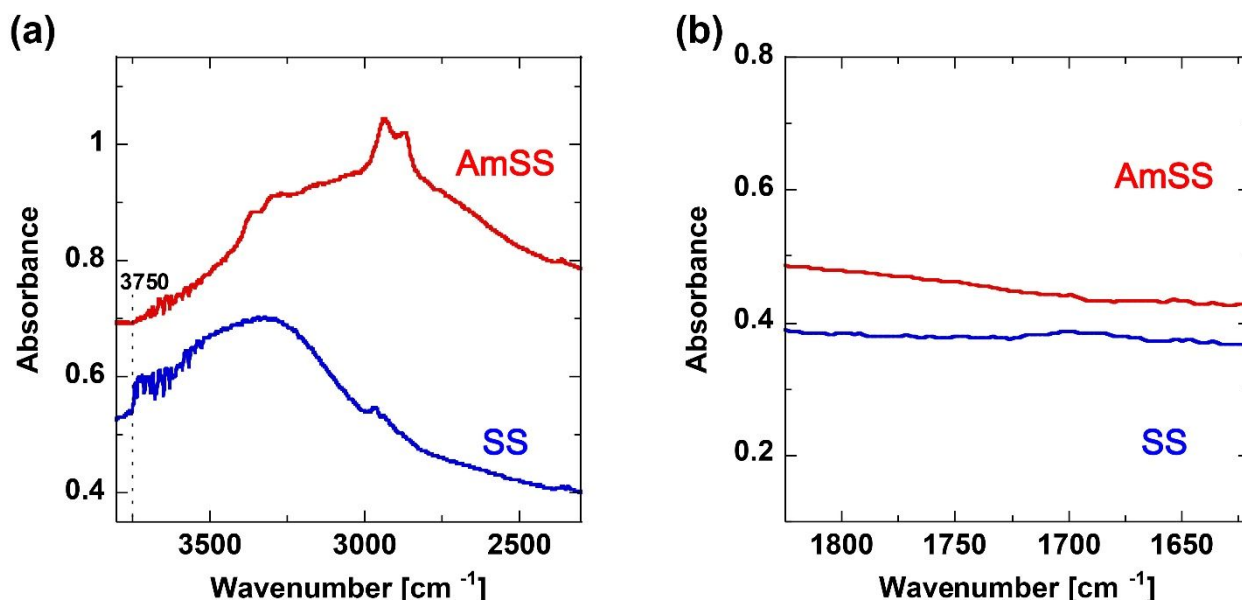

**Figure S5.** FTIR spectra of SS and AmSS in (c) 3800 - 2300  $\text{cm}^{-1}$  and (d) 1825 - 1620  $\text{cm}^{-1}$  regions.

## REFERENCES

- (1) Morrow, B. A.; McFarlan, A. J. Surface vibrational modes of silanol groups on silica. *J. Phys. Chem.* **1992**, *96*, 1395-1400.
